# Supplementary material for: Calving front positions for 19 key glaciers of the Antarctic Peninsula: a sub-seasonal record from 2013 to 2023 based on a deep learning application to Landsat multispectral imagery
Source: Copernicus journal article supplement (doi:10.5194/essd-2023-535), 2024-02-02
Supplement: Supplementary file 1 [file essd-2023-535-supplement.pdf]

*Supplement of*

**Calving front positions for 19 key glaciers of the Antarctic Peninsula: a sub-seasonal record from 2013 to 2023 based on a deep learning application to Landsat multispectral imagery**

**Erik Loebel et al.**

**Correspondence:** Erik Loebel ([erik.loebel@tu-dresden.de](mailto:erik.loebel@tu-dresden.de))



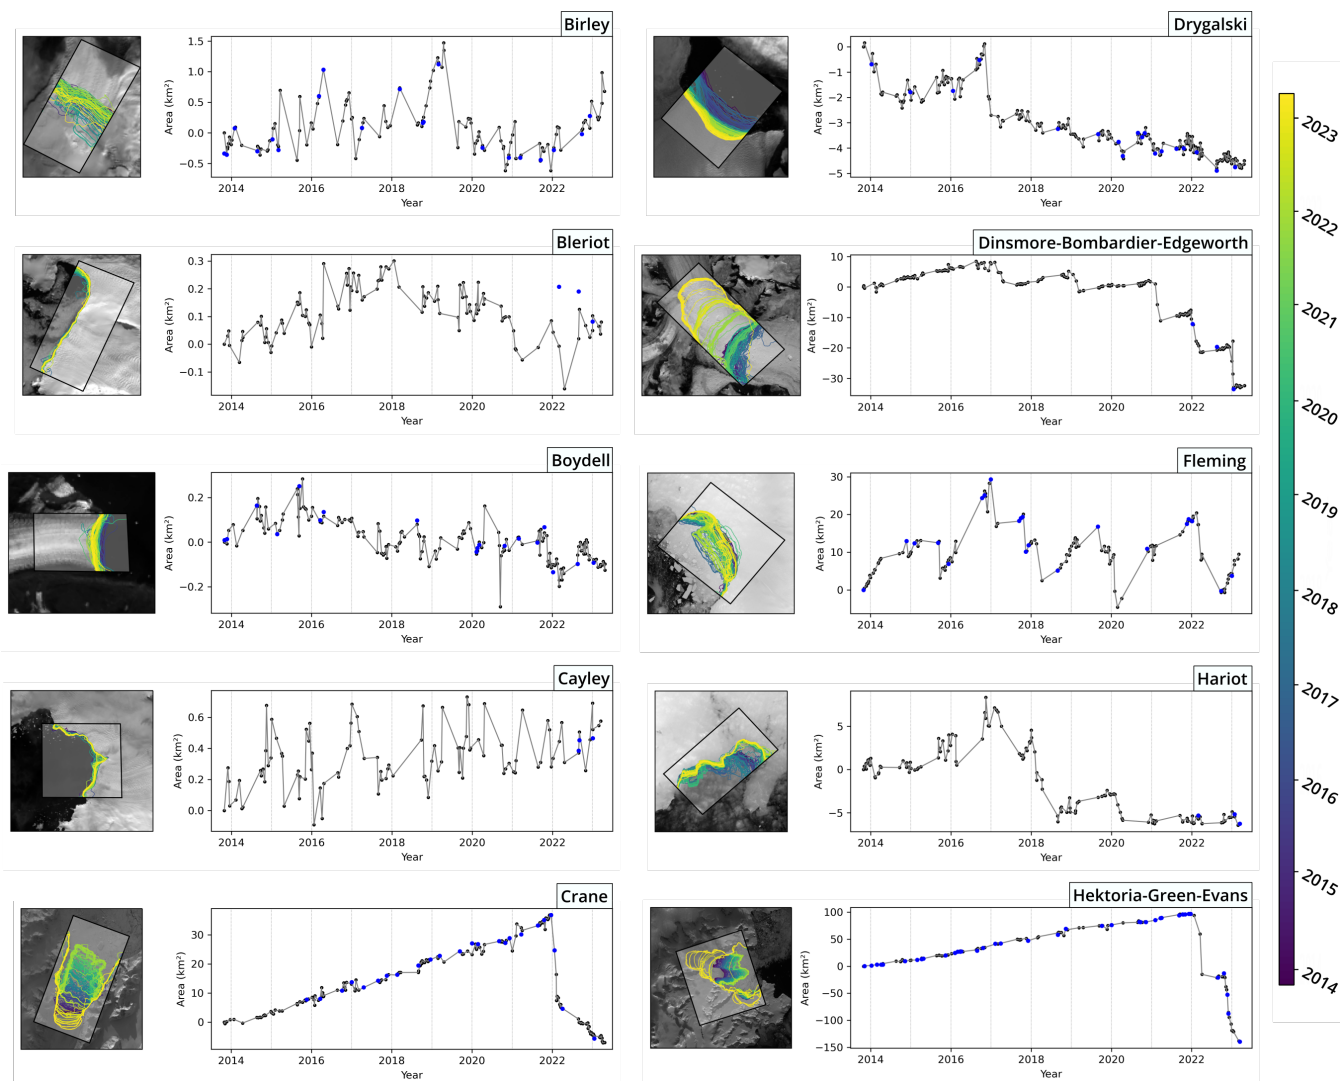

**Figure S2.** Time series generated by our ANN algorithm for 10 of the 19 glaciers provided in our data product. For each glacier, a satellite image, containing the color-coded calving front trajectories, and the corresponding time series is shown. Black dots connected by solid lines mark the automatically delineated calving front positions. The blue dots are additional validation marks that indicate the frontal positions of the manually delimited reference data set. The ANN model was trained using reference data from 2013 to 2021 and tested using data from 2022 and 2023. Note that the ordinate axis is scaled differently for each glacier. Landsat imagery courtesy of the U.S. Geological Survey.

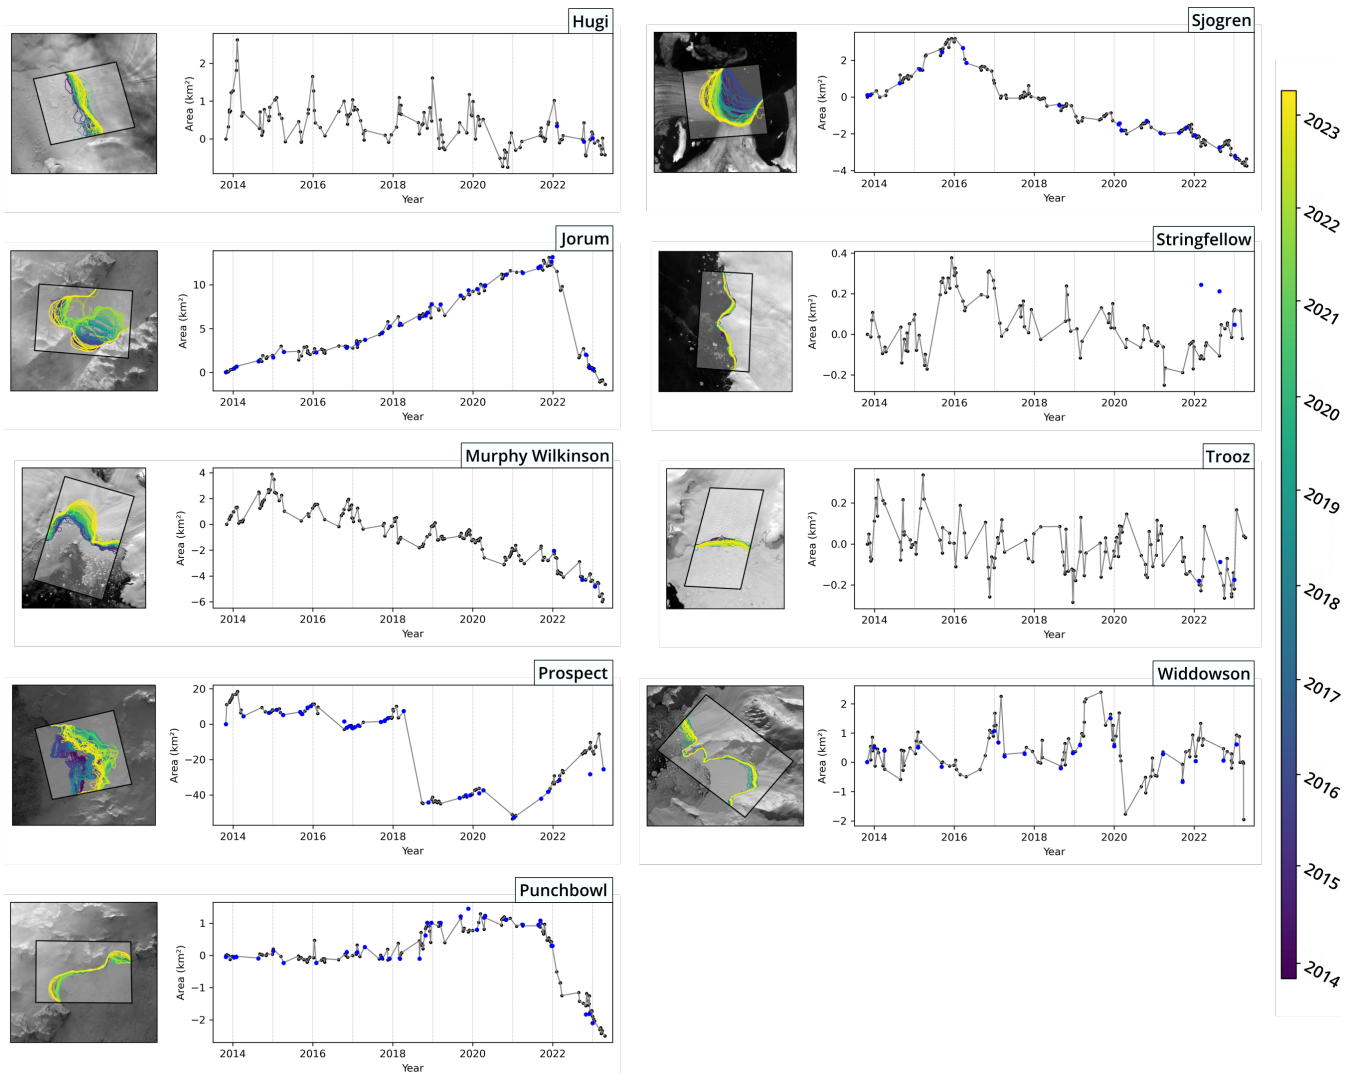

**Figure S3.** Time series generated by our ANN algorithm for 9 of the 19 glaciers provided in our data product. For each glacier, a satellite image, containing the color-coded calving front trajectories, and the corresponding time series is shown. Black dots connected by solid lines mark the automatically delineated calving front positions. The blue dots are additional validation marks that indicate the frontal positions of the manually delimited reference data set. The ANN model was trained using reference data from 2013 to 2021 and tested using data from 2022 and 2023. Note that the ordinate axis is scaled differently for each glacier. Landsat imagery courtesy of the U.S. Geological Survey.
