# Supplementary material for: Calving front positions for 19 key glaciers of the Antarctic Peninsula: a sub-seasonal record from 2013 to 2023 based on a deep learning application to Landsat multispectral imagery
Source: Copernicus journal article supplement (doi:10.5194/essd-2023-535), 2024-02-02
Supplement: Supplementary file [file essd-2023-535-RC1-supplement.pdf]

## **Review of Loebel et al. (2024): Calving front positions for 19 key glaciers of the Antarctic Peninsula: a sub-seasonal record from 2013 to 2023 based on a deep learning application to Landsat multispectral imagery**

### **General comments:**

Firstly, I am not an expert in machine or deep learning techniques, and I can see that the underlying method has already been described in detail in Loebel et al. (2022) and applied to 23 Greenland glaciers in Loebel et al. (2023, in review). I will therefore focus my review on the (1) the dataset itself and the aspects of the methodology relevant to producing a time-series of calving front positions for the community and, (2) the accuracy assessment of the method.

The paper presents an exciting application of an existing deep learning method for delineating glacier calving fronts to 19 glaciers on the Antarctic Peninsula. Compared to Greenland, relatively few terminus position datasets are available for the Antarctic Peninsula and the generation of new terminus positions has not kept pace with the generation of new velocity measurements. As a potential future user of this dataset, it is great to see this application and I am confident that new terminus position delineations on the Peninsula will benefit the community. As such, I am wholeheartedly in support of the generation and publication of these datasets. However, I do not yet think that the presented dataset or manuscript meets the quality and scope required for publication in ESSD, but I am hopeful that the authors will take on board my criticisms and suggestions so that this manuscript and dataset can meet the needs of the community and make best use of the deep learning tool that the author has developed.

### **Specific comments:**

#### 1a) The scope of the dataset

The authors present a total 2064 calving front delineations across 19 outlet glaciers from 2013 to 2023. One of the big questions I had after reading the manuscript was “why not more?”. Just to be clear, I don’t wish to belittle the efforts of the authors – I am sure it is a lot of work to do this and I know it is a lot of work to generate new datasets. However, there are 1,728 basins in the Cook et al. (2014) basin dataset, roughly half of which terminate in an ice shelf, so there are perhaps 800-odd glaciers on the Peninsula that could be targeted by this method. Since the deep learning method was already developed and the majority of the training dataset already existed, and because comparisons to regions outside of Greenland have already been presented in Loebel et al. (2023), it seems like a relatively small additional contribution to run the processing system for just 19 glaciers, especially given that ESSD does not demand any analysis seeking to develop new understanding from the presented dataset, which is typically the bulk of the work in other journals. Again, I am sure it was a lot of work to do this, which I don’t want to detract from, but one of the key benefits of the method used in the manuscript is that it is automatic and much faster than manual approaches, so it should be able to provide “additional and more comprehensive data products”. Therefore, I don’t think it is sufficient to present a terminus position dataset that is (for example) ~25% smaller than that in Wallis et al. (2023), given that the dataset in Wallis et al. (2023) was a relatively small component of their publication. It would be great to see a definitive dataset of terminus positions for the Antarctic Peninsula over the last decade – this and the lead author’s earlier papers demonstrate that we now have the tools and imagery available to achieve this, so I think that is something we should strive for. In order for this dataset to be suitable for publication in ESSD, and to really demonstrate the utility of the underlying deep learning method, I strongly suggest that it should be applied to many more glaciers on the Antarctic Peninsula.

If there is a good scientific or resource reason for limiting the analysis to a small subset of glaciers, then I would still argue for a larger subset including other major glaciers (e.g. Cadman Glacier, which seems like a major omission here), and I think that more justification for the choice of glaciers should be given. At present, the choice is justified twice in the paper, but only briefly and different reasons are given each time.

### 1b) Filtering of 'raw' terminus positions

One of the main focuses of this paper is that it generates new time-series of terminus positions from an existing method. I was surprised therefore that the manuscript didn't describe much post-processing of the terminus positions in order to make an analysis-ready time-series. The only filtering step I could see is that the authors "separate all entries that have an area difference of more than 1 km<sup>2</sup> from the previous and following entries". I don't think that is a sufficiently robust outlier removal technique, especially if you choose to apply this to more glaciers. I suggest that the outlier removal routine should (1) account for the speed of the glacier and time separation between measurements; (2) account for the width of the glacier, because 1 km<sup>2</sup> changes might be realistic or not depending on their width, and; (3) account for changes along flowlines or similar, not just width-averaged metrics. The time-series presented in the manuscript look reasonably clean, but I had a quick look at the dataset which showed up some places where I think the outlier identification may not be working, for example Birley glacier on 2022/10/03 has what looks like an unrealistic advance along its southern branch and Sjogren-Boydell on 2022/03/04 has a ~4 km retreat across what I think is a large section of land. Whichever outlier removal approach is used, the authors should provide details of how many delineations are removed through using it and how that affects the results.

On a related note, I couldn't see any description in the manuscript of partial terminus positions. Does the deep learning approach always provide a full terminus trace? What if the glacier terminus is partially obscured by clouds? Please add detail to the manuscript as necessary.

### 1c) Vectorization of the land/ice probability masks

I couldn't see much justification for the choice of a 0.5 threshold or the impact of that choice of the resulting terminus location. This might be described in the author's earlier papers, but I think ESSD is a suitable place to provide more detail and I think it is relevant to the terminus dataset. Firstly, I think the chosen threshold should be clearly stated in the text, rather than only in the figure (apologies if I just missed it). Secondly, I think there should be a clear quantification, and ideally visualisation, of the impact of that threshold on individual terminus locations and the resulting time-series of area change.

### 1d) Error metric for predicted delineations

Could you provide an error metric for each individual delineation, perhaps by using the spread amongst the 5 models and/or the spread amongst different thresholds? I'm aware that such errors are not provided for manual delineations because it is impractical, but it seems achievable and useful for this method, especially given the apparent differences between each of the 5 models on challenging images shown in Figure 3.

### 1e) Dataset format

I think that dataset would be much easier and quicker to use if there was just one shapefile for each glacier plus one shapefile containing all delineations for all glaciers. Some users are now also using the geopackage format, so the authors might want to consider providing the output in that format also.

### 1f) Dataset contents

It would be great if the training and test data were also released, along with the automatic delineations.

Some glaciers and times seem to be missing a 'coastline' shapefile. Is that expected? Also, the justification in the manuscript for providing two outputs is not clear. Why is the coastline file better than the glacier file for merging with an ice mask? It's implied that the terminus file contains only the glacier edge, whereas the coastline file contains the glacier edge and the edge of the surrounding fjord walls, but this isn't demonstrated clearly nor how that distinction is made if part of the terminus is

obscured by clouds, for example. Please add some clarification and justification in that respect to the manuscript.

### 2a) Accuracy assessment

If I have understood it corrected, the accuracy assessment consists of a comparison between the 5-model mean delineation (with a single threshold) and three manual delineations per glacier outside of the training window. Only one of those images for 10 of the 19 glaciers is shown and otherwise we are provided with some simple metrics summarising the results of 19x3 comparisons. In my view, that is not sufficient to characterise the accuracy of the model in this region. Figure 3 is a useful illustration (though I have some suggestions below), but there is no evidence given that demonstrates that the examples given in Figure 3 are representative of the typical accuracy of the method under those conditions, or what the spread in performance is like in each of those conditions. I suggest that the accuracy assessment should include enough images to provide statistically significant accuracy measures of accuracy for glaciers and images with each of the different characteristics shown in Figure 3. Ideally, it would also show the effect of combinations of those conditions, such as times of low illumination with a scene border, with or without *mélange* and cloud cover.

Figure 3: this is one of the main pieces of evidence presented in the manuscript to convince the reader that the automatic delineations performs as well as a manual delineation. However, showing ~15x15 km images to illustrate differences in position of less than 100 m is not a very clear way to illustrate those differences – the figures would need to be produced at an impractical resolution and I would need a much better monitor to see anything meaningful, and even then I wouldn't be able to measure the differences. I suggest that an additional, more quantitative figure should be provided, to show differences between the automatic and manual delineations for the full test dataset. Perhaps some simple graphs with 'distance along terminus' on the x-axis and 'difference from manual delineation' on the y-axis would allow the authors to plot the differences through the full test dataset every 30 m along each delineation? That kind of plot would also clearly show how those differences are affected by your choice of model and threshold for vectorization. You could have one graph per glacier and perhaps show a histogram for each glacier.

I am unsure that the accuracy metrics of mean and median difference from manual delineations is representative of the differences between the automatic and manual delineations with regard to evaluating the use of the automatic delineations for scientific purposes. As far as I can tell, both of those metrics would be insensitive to large differences between automatic and manual delineations if those differences occur over a short section of the terminus. For example, Figure 3 shows automatic delineations on Prospect are in several places over 1 km from the manual delineation, but the mean difference is small because there are comparatively long sections where the two sets of delineations are in close agreement. This shows up a bit in the Prospect timeseries in Figure 4g, where there is a ~10 km<sup>2</sup> difference between the automatic and manual delineation in late-2022. For glaciological and modelling applications, it might be that those areas of large difference are the bits that matter, so the mean error across the terminus wouldn't be a useful error metric. The other problem with this is that the mean or median difference between the delineations will be highly dependent the length of glacier terminus compared to the length of non-glacier digitised coastline.

As presented, there isn't a compelling demonstration that the dataset is as applicable to science cases than manually-derived datasets, which I think is important given the proposed justification for making the dataset. Another more holistic approach the authors should take to demonstrate the quality of their time-series product, which would go a long way to addressing that concern, would be to compare time-series of area change from these new delineations to area change time-series derived from other terminus position datasets, where both/multiple datasets have sampled the same glacier during overlapping time periods.

### 3) Introduction

I do not think the introduction adequately justifies the need for improved monitoring of outlet glacier terminus position change. As written, it states that (1) ice shelves have reduced in thickness and extent, which has led to glacier speed-up, (2) calving fronts can be used to study ice-ocean interaction and that (3) they can be used to improve model simulations. Those points are all true, but I think they need more detail and specifics in order to make a convincing argument for this new dataset. Consider including more detail of ice shelf and glacier area changes (citing the various papers by Cook et al on the subject) and how much the Peninsula has contributed to Antarctica's total sea level contribution. Are there specific examples of where model performance has been limited or improved by the availability of calving front positions, or has it been quantified in a more general sense? For such models, I think they would need a continual coastline across the whole domain, not small subsets as provided here. In addition, consider drawing on the literature from Greenland, where measurements of terminus position change have led to improvements in our understanding of glacier response to environmental conditions over a range of spatial and temporal scales (e.g. Cowton et al., 2018) or have at least aided the interpretation of changes in ice speed, and how they have been used in combination with estimates of submarine melt rates to develop new parameterisations for the impact of submarine melting on calving and terminus position (Slater et al., 2019). Terminus positions are really useful, but I don't think that comes across in the introduction as currently written.

Cowton, T.R., Sole, A.J., Nienow, P.W., Slater, D.A. and Christoffersen, P., 2018. Linear response of east Greenland's tidewater glaciers to ocean/atmosphere warming. *Proceedings of the National Academy of Sciences*, 115(31), pp.7907-7912.

Slater, D. A., Straneo, F., Felikson, D., Little, C. M., Goelzer, H., Fettweis, X., and Holte, J.: Estimating Greenland tidewater glacier retreat driven by submarine melting, *The Cryosphere*, 13, 2489–2509, <https://doi.org/10.5194/tc-13-2489-2019>, 2019.

#### **Minor comments**

Line 4: suggest “rely on manual delineation, **which is** time-consuming”

Line 8: suggest “The data product presented here”

Line 16: ice **shelf**

Line 17: “forcing from ocean and atmosphere has led to reduced ice shelf thickness and extent. And this, in turn, has reduced buttressing strength and thereby increased outlet glacier dynamics”. I don't think this is a fair summary of our current understanding of ice shelf and glacier changes on the Peninsula. Can you add more detail on what is meant by “forcing”. I don't really know what is meant by “increased outlet glacier dynamics” because “dynamics” is a general term for changes in glacier speed, thickness and extent. Consider rewording this sentence to clarify your meaning.

Line 20: **utmost**

Line 33/34: I think you can make this point more strongly. It's quite possible a reader could look at Table 1 and this paragraph and think “wow, there are loads of terminus position measurements on the AP”, because thousands looks like a lot, then they would be confused when they read this statement on line 33/34. So I think it would help to provide some context along the lines of: “there are approximately 800 tidewater glaciers on the AP [you could count them?], so we are currently missing 800 glaciers x 8 illuminated months x 10 years = 64,000 terminus delineations since 2013 (minus five thousand or so from existing studies), even if we only mapped them once per month, but weekly measurements are

now possible with the abundance of satellite imagery. Plus many glaciers have only ever been measured a handful of times since 1940 (Cook et al.), or something to that effect.

Line 34: “we need to use automatic annotation methods”. We don’t really need to, as demonstrated by the numerous manual delineations on Greenland, but it is much much faster to do it automatically. So consider rephrasing and combining with the following paragraph to emphasise that we now have the tools available to map them automatically.

Line 44: “new reference data”: later this is called “training data” are those different or have you switched terminology?

Line 45: This glacier justification is quite weak, but see my major comment above.

Line 49: Sjøgren and Boydell were tributaries of Prince Gustav Ice Shelf, not Larsen-A, weren’t they?

Line 63: need a comma after “pre-processing”

Line 82: need a comma after “receptive field”

Line 83/84: please specify the threshold for vectorization here and include justification for the choice, and if you add a new figure/section quantifying that impact, it would be good to signpost it here too.

Line 85: I don’t quite follow this step because the mask hasn’t been described. What is the static mask and how was it derived? What do you do if the glacier retreats or advances beyond the extent of the mask?

Line 89: “separated entries are checked manually” and then put back in if you disagree with the algorithm? Or something else?

Line 105: “more accurate predictions” than what?

Line 123: for glacier modelling, I think the preference would normally be for a raster mask rather than a vector. Consider including masks in addition to the vector dataset, to facilitate use by the modelling community.

Line 130: Without expanding this study to other glaciers, I think a combined analysis of circum-Antarctic calving front change would not be possible, so I’m not sure that this statement is warranted with the current dataset.

Line 134: “such high temporal resolution” is carrying a lot of weight here. Given that the terminus of those glaciers have already been delineated regularly in recent studies (Ochwat et al., 2022; Surawy-Stepney et al., 2023), I don’t think this statement is justified.

Line 141: I’m not sure what the purpose of this statement is given that this doesn’t appear to be an operational product. Consider removing or rephrasing.

Figure 1: “Larsen Ice Shelf” should be “Larsen-C Ice Shelf”, if it even needs to be labelled at all.

Table 2: I’m not a machine learning user, so this may be a stupid question. Should any of the binary classification metrics have units?

Figure 3: I think this would be clearer without the manually digitised terminus on. Or at least it would be nice to see a version like that in the supplementary information.

Benjamin Davison
